# Supplementary material
Source: MDPI journal article supplement (https://www.mdpi.com/2225-1154/10/5/70)
Supplement: s1 [file s1]

Archive with 1 entries (1 files):
- climate-1712844-supplementary.pdf
